# Supplementary material
Source: Royal Society of Chemistry journal article supplement (doi:10.1039/d6ta03008d)
Supplement: d6ta03008d1.xlsx [file d6ta03008d1.xlsx]

## Sheet: all-tio2-character
doped_element	Vo	Z	MW	χ	R	EI	EA	Nd	P	G
Sc	1	21	44.96	1.36	1.84	633.1	18.1	1	4	3
Ti	1	22	47.867	1.54	1.76	658.8	7.6	2	4	4
V	1	23	50.94	1.63	1.71	650.9	50.6	3	4	5
Cr	1	24	52	1.66	1.66	652.9	64.3	5	4	6
Mn	1	25	54.94	1.55	1.61	717.3	0	5	4	7
Fe	1	26	55.845	1.83	1.56	762.5	15.7	6	4	8
Co	1	27	58.93	1.88	1.52	760.4	63.7	7	4	9
Ni	1	28	58.69	1.91	1.49	737.1	112	8	4	10
Cu	1	29	63.546	1.9	1.45	745.5	118.4	10	4	11
Zn	1	30	65.38	1.65	1.42	906.4	0	10	4	12
Y	1	39	88.91	1.22	2.12	600	29.6	1	5	3
Zr	1	40	81.224	1.33	2.06	640.1	41.1	2	5	4
Nb	1	41	92.91	1.6	1.98	652.1	86.1	4	5	5
Mo	1	42	95.95	2.16	1.9	684.3	71.9	5	5	6
Tc	1	43	98	1.9	1.83	702	53	5	5	7
Ru	1	44	101.07	2.2	1.78	710.2	101.3	7	5	8
Rh	1	45	102.91	2.28	1.73	719.7	109.7	8	5	9
Pd	1	46	106.42	2.2	1.69	804.4	53.7	10	5	10
Ag	1	47	107.87	1.93	1.65	731	125.6	10	5	11
Cd	1	48	112.414	1.69	1.61	867.8	0	10	5	12
Hf	1	72	178.486	1.3	2.08	658.5	0	2	6	4
Ta	1	73	180.95	1.5	2	761	31	3	6	5
W	1	74	183.84	2.36	1.93	770	78.6	4	6	6
Re	1	75	186.21	1.9	1.88	760	14.5	5	6	7
Os	1	76	190.23	2.2	1.85	840	106.1	6	6	8
Ir	1	77	192.217	2.2	1.8	880	151	7	6	9
Pt	1	78	195.084	2.28	1.77	870	205.3	9	6	10
Au	1	79	196.97	2.54	1.74	890.1	222.8	10	6	11
Hg	1	80	200.59	2	1.71	1007.1	0	10	6	12
Sc	0	21	44.96	1.36	1.84	633.1	18.1	1	4	3
Ti	0	22	47.867	1.54	1.76	658.8	7.6	2	4	4
V	0	23	50.94	1.63	1.71	650.9	50.6	3	4	5
Cr	0	24	52	1.66	1.66	652.9	64.3	5	4	6
Mn	0	25	54.94	1.55	1.61	717.3	0	5	4	7
Fe	0	26	55.845	1.83	1.56	762.5	15.7	6	4	8
Co	0	27	58.93	1.88	1.52	760.4	63.7	7	4	9
Ni	0	28	58.69	1.91	1.49	737.1	112	8	4	10
Cu	0	29	63.546	1.9	1.45	745.5	118.4	10	4	11
Zn	0	30	65.38	1.65	1.42	906.4	0	10	4	12
Y	0	39	88.91	1.22	2.12	600	29.6	1	5	3
Zr	0	40	81.224	1.33	2.06	640.1	41.1	2	5	4
Nb	0	41	92.91	1.6	1.98	652.1	86.1	4	5	5
Mo	0	42	95.95	2.16	1.9	684.3	71.9	5	5	6
Tc	0	43	98	1.9	1.83	702	53	5	5	7
Ru	0	44	101.07	2.2	1.78	710.2	101.3	7	5	8
Rh	0	45	102.91	2.28	1.73	719.7	109.7	8	5	9
Pd	0	46	106.42	2.2	1.69	804.4	53.7	10	5	10
Ag	0	47	107.87	1.93	1.65	731	125.6	10	5	11
Cd	0	48	112.414	1.69	1.61	867.8	0	10	5	12
Hf	0	72	178.486	1.3	2.08	658.5	0	2	6	4
Ta	0	73	180.95	1.5	2	761	31	3	6	5
W	0	74	183.84	2.36	1.93	770	78.6	4	6	6
Re	0	75	186.21	1.9	1.88	760	14.5	5	6	7
Os	0	76	190.23	2.2	1.85	840	106.1	6	6	8
Ir	0	77	192.217	2.2	1.8	880	151	7	6	9
Pt	0	78	195.084	2.28	1.77	870	205.3	9	6	10
Au	0	79	196.97	2.54	1.74	890.1	222.8	10	6	11
Hg	0	80	200.59	2	1.71	1007.1	0	10	6	12

## Sheet: eform-dft-tio2-character
Eform	doped_element	Vo	Z	MW	χ	R	EI	EA	Nd	P	G
-4.44787	Fe	1	26	55.845	1.83	1.56	762.5	15.7	6	4	8
-3.05673	Ni	1	28	58.69	1.91	1.49	737.1	112	8	4	10
-8.40985	Ti	1	22	47.867	1.54	1.76	658.8	7.6	2	4	4
-1.59729	Ag	1	47	107.87	1.93	1.65	731	125.6	10	5	11
-1.76826	Rh	1	45	102.91	2.28	1.73	719.7	109.7	8	5	9
-9.5787	Y	1	39	88.91	1.22	2.12	600	29.6	1	5	3
-1.08301	Ir	1	77	192.217	2.2	1.8	880	151	7	6	9
-10.981	V	1	23	50.94	1.63	1.71	650.9	50.6	3	4	5
-1.85697	Ru	1	44	101.07	2.2	1.78	710.2	101.3	7	5	8
-1.40614	Pt	1	78	195.084	2.28	1.77	870	205.3	9	6	10
-4.95428	Zn	1	30	65.38	1.65	1.42	906.4	0	10	4	12
-5.44215	Mn	1	25	54.94	1.55	1.61	717.3	0	5	4	7
-8.9269	Zr	1	40	81.224	1.33	2.06	640.1	41.1	2	5	4
-3.7943	W	1	74	183.84	2.36	1.93	770	78.6	4	6	6
-0.995228	Os	1	76	190.23	2.2	1.85	840	106.1	6	6	8
-12.9625	Y	0	39	88.91	1.22	2.12	600	29.6	1	5	3
-5.1972	Ir	0	77	192.217	2.2	1.8	880	151	7	6	9
-3.45776	Co	1	27	58.93	1.88	1.52	760.4	63.7	7	4	9
-1.73334	Pd	1	46	106.42	2.2	1.69	804.4	53.7	10	5	10
-10.0713	Cr	0	24	52	1.66	1.66	652.9	64.3	5	4	6
-9.48034	Mn	0	25	54.94	1.55	1.61	717.3	0	5	4	7
-9.51466	W	0	74	183.84	2.36	1.93	770	78.6	4	6	6
-3.62322	Hg	0	80	200.59	2	1.71	1007.1	0	10	6	12
-4.74685	Pd	0	46	106.42	2.2	1.69	804.4	53.7	10	5	10
-8.22189	Fe	0	26	55.845	1.83	1.56	762.5	15.7	6	4	8
-3.42338	Ag	0	47	107.87	1.93	1.65	731	125.6	10	5	11
-6.66298	Co	0	27	58.93	1.88	1.52	760.4	63.7	7	4	9
-5.65318	Ni	0	28	58.69	1.91	1.49	737.1	112	8	4	10
-5.72041	Os	0	76	190.23	2.2	1.85	840	106.1	6	6	8
-12.5622	Nb	0	41	92.91	1.6	1.98	652.1	86.1	4	5	5
-5.68811	Zn	0	30	65.38	1.65	1.42	906.4	0	10	4	12
-5.74219	Rh	0	45	102.91	2.28	1.73	719.7	109.7	8	5	9
-12.6858	Ti	0	22	47.867	1.54	1.76	658.8	7.6	2	4	4
-6.49773	Ru	0	44	101.07	2.2	1.78	710.2	101.3	7	5	8
-14.9074	Zr	0	40	81.224	1.33	2.06	640.1	41.1	2	5	4
-11.7001	V	0	23	50.94	1.63	1.71	650.9	50.6	3	4	5
-9.52176	Mo	0	42	95.95	2.16	1.9	684.3	71.9	5	5	6
-2.56568	Hg	1	80	200.59	2	1.71	1007.1	0	10	6	12
-5.27475	Cr	1	24	52	1.66	1.66	652.9	64.3	5	4	6
-6.61553	Nb	1	41	92.91	1.6	1.98	652.1	86.1	4	5	5
-4.80523	Pt	0	78	195.084	2.28	1.77	870	205.3	9	6	10
-3.66572	Au	0	79	196.97	2.54	1.74	890.1	222.8	10	6	11
-1.19757	Au	1	79	196.97	2.54	1.74	890.1	222.8	10	6	11
-4.24107	Cd	1	48	112.414	1.69	1.61	867.8	0	10	5	12

## Sheet: eform-external_validation
Eform	doped_element	Vo	Z	MW	χ	R	EI	EA	Nd	P	G
-4.03069	Mo	1	42	95.95	2.16	1.9	684.3	71.9	5	5	6
-2.78032	Tc	1	43	98	1.9	1.83	702	53	5	5	7
-6.94192	Ta	1	73	180.95	1.5	2	761	31	3	6	5
-9.1324	Hf	1	72	178.486	1.3	2.08	658.5	0	2	6	4
-8.14236	Tc	0	43	98	1.9	1.83	702	53	5	5	7
-12.9885	Ta	0	73	180.95	1.5	2	761	31	3	6	5
-15.24	Hf	0	72	178.486	1.3	2.08	658.5	0	2	6	4

## Sheet: eform-external_validation_predi
Eform	doped_element	Vo	Z	MW	χ	R	EI	EA	Nd	P	G	DFT_Eform	Predicted_Eform	Error	Abs_Error
-4.03069	Mo	1	42	95.95	2.16	1.9	684.3	71.9	5	5	6	-4.03069	-4.48335	-0.452657	0.452657
-2.78032	Tc	1	43	98	1.9	1.83	702	53	5	5	7	-2.78032	-4.31452	-1.5342	1.5342
-6.94192	Ta	1	73	180.95	1.5	2	761	31	3	6	5	-6.94192	-7.36745	-0.425528	0.425528
-9.1324	Hf	1	72	178.486	1.3	2.08	658.5	0	2	6	4	-9.1324	-8.33652	0.795882	0.795882
-8.14236	Tc	0	43	98	1.9	1.83	702	53	5	5	7	-8.14236	-9.1927	-1.05034	1.05034
-12.9885	Ta	0	73	180.95	1.5	2	761	31	3	6	5	-12.9885	-11.1456	1.84291	1.84291
-15.24	Hf	0	72	178.486	1.3	2.08	658.5	0	2	6	4	-15.24	-12.9093	2.3307	2.3307

## Sheet: eform-predicted_results
doped_element	Vo	Z	MW	χ	R	EI	EA	Nd	P	G	Eform
Ag	1	47	107.87	1.93	1.65	731	125.6	10	5	11	-1.52462
Ag	0	47	107.87	1.93	1.65	731	125.6	10	5	11	-3.50577
Au	1	79	196.97	2.54	1.74	890.1	222.8	10	6	11	-1.19922
Au	0	79	196.97	2.54	1.74	890.1	222.8	10	6	11	-3.68857
Cd	1	48	112.414	1.69	1.61	867.8	0	10	5	12	-4.28204
Cd	0	48	112.414	1.69	1.61	867.8	0	10	5	12	-4.50489
Co	1	27	58.93	1.88	1.52	760.4	63.7	7	4	9	-3.50571
Co	0	27	58.93	1.88	1.52	760.4	63.7	7	4	9	-6.63152
Cr	1	24	52	1.66	1.66	652.9	64.3	5	4	6	-5.40487
Cr	0	24	52	1.66	1.66	652.9	64.3	5	4	6	-9.96829
Cu	1	29	63.546	1.9	1.45	745.5	118.4	10	4	11	-3.00083
Cu	0	29	63.546	1.9	1.45	745.5	118.4	10	4	11	-4.7734
Fe	1	26	55.845	1.83	1.56	762.5	15.7	6	4	8	-4.44869
Fe	0	26	55.845	1.83	1.56	762.5	15.7	6	4	8	-8.14859
Hf	1	72	178.486	1.3	2.08	658.5	0	2	6	4	-8.28933
Hf	0	72	178.486	1.3	2.08	658.5	0	2	6	4	-13.1931
Hg	1	80	200.59	2	1.71	1007.1	0	10	6	12	-2.48539
Hg	0	80	200.59	2	1.71	1007.1	0	10	6	12	-3.68634
Ir	1	77	192.217	2.2	1.8	880	151	7	6	9	-1.18931
Ir	0	77	192.217	2.2	1.8	880	151	7	6	9	-5.09038
Mn	1	25	54.94	1.55	1.61	717.3	0	5	4	7	-5.44129
Mn	0	25	54.94	1.55	1.61	717.3	0	5	4	7	-9.49987
Mo	1	42	95.95	2.16	1.9	684.3	71.9	5	5	6	-4.79391
Mo	0	42	95.95	2.16	1.9	684.3	71.9	5	5	6	-9.56083
Nb	1	41	92.91	1.6	1.98	652.1	86.1	4	5	5	-6.55029
Nb	0	41	92.91	1.6	1.98	652.1	86.1	4	5	5	-12.5959
Ni	1	28	58.69	1.91	1.49	737.1	112	8	4	10	-2.98737
Ni	0	28	58.69	1.91	1.49	737.1	112	8	4	10	-5.73519
Os	1	76	190.23	2.2	1.85	840	106.1	6	6	8	-1.084
Os	0	76	190.23	2.2	1.85	840	106.1	6	6	8	-5.66104
Pd	1	46	106.42	2.2	1.69	804.4	53.7	10	5	10	-1.88782
Pd	0	46	106.42	2.2	1.69	804.4	53.7	10	5	10	-4.58342
Pt	1	78	195.084	2.28	1.77	870	205.3	9	6	10	-1.41804
Pt	0	78	195.084	2.28	1.77	870	205.3	9	6	10	-4.75932
Re	1	75	186.21	1.9	1.88	760	14.5	5	6	7	-3.93067
Re	0	75	186.21	1.9	1.88	760	14.5	5	6	7	-8.93409
Rh	1	45	102.91	2.28	1.73	719.7	109.7	8	5	9	-1.6753
Rh	0	45	102.91	2.28	1.73	719.7	109.7	8	5	9	-5.83357
Ru	1	44	101.07	2.2	1.78	710.2	101.3	7	5	8	-1.82949
Ru	0	44	101.07	2.2	1.78	710.2	101.3	7	5	8	-6.48676
Sc	1	21	44.96	1.36	1.84	633.1	18.1	1	4	3	-9.35907
Sc	0	21	44.96	1.36	1.84	633.1	18.1	1	4	3	-13.1382
Ta	1	73	180.95	1.5	2	761	31	3	6	5	-7.44125
Ta	0	73	180.95	1.5	2	761	31	3	6	5	-11.5221
Tc	1	43	98	1.9	1.83	702	53	5	5	7	-3.77752
Tc	0	43	98	1.9	1.83	702	53	5	5	7	-8.994
Ti	1	22	47.867	1.54	1.76	658.8	7.6	2	4	4	-8.46409
Ti	0	22	47.867	1.54	1.76	658.8	7.6	2	4	4	-12.6224
V	1	23	50.94	1.63	1.71	650.9	50.6	3	4	5	-10.7577
V	0	23	50.94	1.63	1.71	650.9	50.6	3	4	5	-11.932
W	1	74	183.84	2.36	1.93	770	78.6	4	6	6	-3.81507
W	0	74	183.84	2.36	1.93	770	78.6	4	6	6	-9.48106
Y	1	39	88.91	1.22	2.12	600	29.6	1	5	3	-9.50713
Y	0	39	88.91	1.22	2.12	600	29.6	1	5	3	-13.0575
Zn	1	30	65.38	1.65	1.42	906.4	0	10	4	12	-4.85981
Zn	0	30	65.38	1.65	1.42	906.4	0	10	4	12	-5.77832
Zr	1	40	81.224	1.33	2.06	640.1	41.1	2	5	4	-9.0682
Zr	0	40	81.224	1.33	2.06	640.1	41.1	2	5	4	-14.7464

## Sheet: gnnoh-dft-tio2-character
gnnoh	doped_element	Vo	Z	MW	χ	R	EI	EA	Nd	P	G
2.99458	Cr	1	24	52	1.66	1.66	652.9	64.3	5	4	6
3.18258	Ag	1	47	107.87	1.93	1.65	731	125.6	10	5	11
3.12066	Rh	1	45	102.91	2.28	1.73	719.7	109.7	8	5	9
2.90122	Y	1	39	88.91	1.22	2.12	600	29.6	1	5	3
2.93043	Ti	1	22	47.867	1.54	1.76	658.8	7.6	2	4	4
3.08563	Ir	1	77	192.217	2.2	1.8	880	151	7	6	9
2.67633	V	1	23	50.94	1.63	1.71	650.9	50.6	3	4	5
2.91178	Ru	1	44	101.07	2.2	1.78	710.2	101.3	7	5	8
3.4466	Pt	1	78	195.084	2.28	1.77	870	205.3	9	6	10
3.17237	Mn	1	25	54.94	1.55	1.61	717.3	0	5	4	7
2.79755	Au	1	79	196.97	2.54	1.74	890.1	222.8	10	6	11
3.28166	Cd	1	48	112.414	1.69	1.61	867.8	0	10	5	12
2.68047	Zr	1	40	81.224	1.33	2.06	640.1	41.1	2	5	4
2.01518	W	1	74	183.84	2.36	1.93	770	78.6	4	6	6
2.55908	Os	1	76	190.23	2.2	1.85	840	106.1	6	6	8
2.30992	Mo	1	42	95.95	2.16	1.9	684.3	71.9	5	5	6
3.32659	Fe	1	26	55.845	1.83	1.56	762.5	15.7	6	4	8
3.2846	Ni	1	28	58.69	1.91	1.49	737.1	112	8	4	10
3.22339	Co	1	27	58.93	1.88	1.52	760.4	63.7	7	4	9
3.50944	Pd	1	46	106.42	2.2	1.69	804.4	53.7	10	5	10
3.1439	Cr	0	24	52	1.66	1.66	652.9	64.3	5	4	6
2.02636	W	0	74	183.84	2.36	1.93	770	78.6	4	6	6
3.27224	Y	0	39	88.91	1.22	2.12	600	29.6	1	5	3
3.20164	Ir	0	77	192.217	2.2	1.8	880	151	7	6	9
3.23199	Hg	0	80	200.59	2	1.71	1007.1	0	10	6	12
2.57738	Nb	0	41	92.91	1.6	1.98	652.1	86.1	4	5	5
3.73009	Fe	0	26	55.845	1.83	1.56	762.5	15.7	6	4	8
3.4074	Co	0	27	58.93	1.88	1.52	760.4	63.7	7	4	9
3.22068	Ni	0	28	58.69	1.91	1.49	737.1	112	8	4	10
2.69453	Os	0	76	190.23	2.2	1.85	840	106.1	6	6	8
3.20507	Pd	0	46	106.42	2.2	1.69	804.4	53.7	10	5	10
3.24449	Zn	0	30	65.38	1.65	1.42	906.4	0	10	4	12
3.26163	Rh	0	45	102.91	2.28	1.73	719.7	109.7	8	5	9
3.44214	Pt	0	78	195.084	2.28	1.77	870	205.3	9	6	10
3.05498	Au	0	79	196.97	2.54	1.74	890.1	222.8	10	6	11
3.27475	Mn	0	25	54.94	1.55	1.61	717.3	0	5	4	7
2.98434	Ru	0	44	101.07	2.2	1.78	710.2	101.3	7	5	8
3.2359	Zr	0	40	81.224	1.33	2.06	640.1	41.1	2	5	4
3.20189	V	0	23	50.94	1.63	1.71	650.9	50.6	3	4	5
2.43125	Mo	0	42	95.95	2.16	1.9	684.3	71.9	5	5	6
3.60281	Ti	0	22	47.867	1.54	1.76	658.8	7.6	2	4	4

## Sheet: gnnoh-external_validation
gnnoh	doped_element	Vo	Z	MW	χ	R	EI	EA	Nd	P	G
2.31051	Mo	1	42	95.95	2.16	1.9	684.3	71.9	5	5	6
2.61758	Tc	1	43	98	1.9	1.83	702	53	5	5	7
2.37989	Ta	1	73	180.95	1.5	2	761	31	3	6	5
2.61962	Hf	1	72	178.486	1.3	2.08	658.5	0	2	6	4
2.57892	Tc	0	43	98	1.9	1.83	702	53	5	5	7
2.47973	Ta	0	73	180.95	1.5	2	761	31	3	6	5
3.29156	Hf	0	72	178.486	1.3	2.08	658.5	0	2	6	4

## Sheet: gnnoh-external_validation_predi
gnnoh	doped_element	Vo	Z	MW	χ	R	EI	EA	Nd	P	G	DFT_G_NNOH	Predicted_G_NNOH	Error	Abs_Error
2.31051	Mo	1	42	95.95	2.16	1.9	684.3	71.9	5	5	6	2.31051	2.42423	0.113718	0.113718
2.61758	Tc	1	43	98	1.9	1.83	702	53	5	5	7	2.61758	2.52646	-0.0911247	0.0911247
2.37989	Ta	1	73	180.95	1.5	2	761	31	3	6	5	2.37989	2.5723	0.19241	0.19241
2.61962	Hf	1	72	178.486	1.3	2.08	658.5	0	2	6	4	2.61962	2.82095	0.201328	0.201328
2.57892	Tc	0	43	98	1.9	1.83	702	53	5	5	7	2.57892	2.61178	0.0328598	0.0328598
2.47973	Ta	0	73	180.95	1.5	2	761	31	3	6	5	2.47973	2.66744	0.187705	0.187705
3.29156	Hf	0	72	178.486	1.3	2.08	658.5	0	2	6	4	3.29156	3.18917	-0.102389	0.102389

## Sheet: gnnoh-predicted_results
doped_element	Vo	Z	MW	χ	R	EI	EA	Nd	P	G	gnnoh
Sc	1	21	44.96	1.36	1.84	633.1	18.1	1	4	3	2.8265
Ti	1	22	47.867	1.54	1.76	658.8	7.6	2	4	4	2.97545
V	1	23	50.94	1.63	1.71	650.9	50.6	3	4	5	2.72195
Cr	1	24	52	1.66	1.66	652.9	64.3	5	4	6	2.95858
Mn	1	25	54.94	1.55	1.61	717.3	0	5	4	7	3.14473
Fe	1	26	55.845	1.83	1.56	762.5	15.7	6	4	8	3.33303
Co	1	27	58.93	1.88	1.52	760.4	63.7	7	4	9	3.27146
Ni	1	28	58.69	1.91	1.49	737.1	112	8	4	10	3.27608
Cu	1	29	63.546	1.9	1.45	745.5	118.4	10	4	11	3.22081
Zn	1	30	65.38	1.65	1.42	906.4	0	10	4	12	3.19341
Y	1	39	88.91	1.22	2.12	600	29.6	1	5	3	2.85994
Zr	1	40	81.224	1.33	2.06	640.1	41.1	2	5	4	2.70516
Nb	1	41	92.91	1.6	1.98	652.1	86.1	4	5	5	2.42868
Mo	1	42	95.95	2.16	1.9	684.3	71.9	5	5	6	2.34038
Tc	1	43	98	1.9	1.83	702	53	5	5	7	2.84461
Ru	1	44	101.07	2.2	1.78	710.2	101.3	7	5	8	2.84461
Rh	1	45	102.91	2.28	1.73	719.7	109.7	8	5	9	3.13829
Pd	1	46	106.42	2.2	1.69	804.4	53.7	10	5	10	3.39525
Ag	1	47	107.87	1.93	1.65	731	125.6	10	5	11	3.18153
Cd	1	48	112.414	1.69	1.61	867.8	0	10	5	12	3.28641
Hf	1	72	178.486	1.3	2.08	658.5	0	2	6	4	2.8581
Ta	1	73	180.95	1.5	2	761	31	3	6	5	2.78308
W	1	74	183.84	2.36	1.93	770	78.6	4	6	6	2.01635
Re	1	75	186.21	1.9	1.88	760	14.5	5	6	7	2.42651
Os	1	76	190.23	2.2	1.85	840	106.1	6	6	8	2.60152
Ir	1	77	192.217	2.2	1.8	880	151	7	6	9	3.11588
Pt	1	78	195.084	2.28	1.77	870	205.3	9	6	10	3.4257
Au	1	79	196.97	2.54	1.74	890.1	222.8	10	6	11	2.82484
Hg	1	80	200.59	2	1.71	1007.1	0	10	6	12	3.16017
Sc	0	21	44.96	1.36	1.84	633.1	18.1	1	4	3	3.42787
Ti	0	22	47.867	1.54	1.76	658.8	7.6	2	4	4	3.54694
V	0	23	50.94	1.63	1.71	650.9	50.6	3	4	5	3.16596
Cr	0	24	52	1.66	1.66	652.9	64.3	5	4	6	3.16947
Mn	0	25	54.94	1.55	1.61	717.3	0	5	4	7	3.3077
Fe	0	26	55.845	1.83	1.56	762.5	15.7	6	4	8	3.69407
Co	0	27	58.93	1.88	1.52	760.4	63.7	7	4	9	3.36215
Ni	0	28	58.69	1.91	1.49	737.1	112	8	4	10	3.23771
Cu	0	29	63.546	1.9	1.45	745.5	118.4	10	4	11	3.23219
Zn	0	30	65.38	1.65	1.42	906.4	0	10	4	12	3.25661
Y	0	39	88.91	1.22	2.12	600	29.6	1	5	3	3.31837
Zr	0	40	81.224	1.33	2.06	640.1	41.1	2	5	4	3.19981
Nb	0	41	92.91	1.6	1.98	652.1	86.1	4	5	5	2.59994
Mo	0	42	95.95	2.16	1.9	684.3	71.9	5	5	6	2.40526
Tc	0	43	98	1.9	1.83	702	53	5	5	7	3.11929
Ru	0	44	101.07	2.2	1.78	710.2	101.3	7	5	8	3.05414
Rh	0	45	102.91	2.28	1.73	719.7	109.7	8	5	9	3.23301
Pd	0	46	106.42	2.2	1.69	804.4	53.7	10	5	10	3.33102
Ag	0	47	107.87	1.93	1.65	731	125.6	10	5	11	3.19241
Cd	0	48	112.414	1.69	1.61	867.8	0	10	5	12	3.33995
Hf	0	72	178.486	1.3	2.08	658.5	0	2	6	4	3.20079
Ta	0	73	180.95	1.5	2	761	31	3	6	5	3.27653
W	0	74	183.84	2.36	1.93	770	78.6	4	6	6	2.03352
Re	0	75	186.21	1.9	1.88	760	14.5	5	6	7	2.69898
Os	0	76	190.23	2.2	1.85	840	106.1	6	6	8	2.64952
Ir	0	77	192.217	2.2	1.8	880	151	7	6	9	3.17488
Pt	0	78	195.084	2.28	1.77	870	205.3	9	6	10	3.43603
Au	0	79	196.97	2.54	1.74	890.1	222.8	10	6	11	3.03841
Hg	0	80	200.59	2	1.71	1007.1	0	10	6	12	3.23212
